# Supplementary material
Source: MDPI journal article supplement (https://www.mdpi.com/2076-3417/12/22/11425)
Supplement: s1 [file s1]

# SUPPLEMENTARY MATERIALS

**Table S1.** Eroded soil analysis for pot essays.

| Parameter  | Concentration (ppm) | Recommended levels (ppm) | Actual level of eroded soil |
|------------|---------------------|--------------------------|-----------------------------|
| Phosphorus | 15.0                | 15.0-30.0                | Low                         |
| Sodium     | 110.0               | <150                     | In level                    |
| Potassium  | 300                 | 100-250                  | High                        |
| Calcium    | 1,480.00            | 1500-3500                | Low                         |
| Magnesium  | 450.00              | 200-500                  | In level                    |
| Iron       | 40.00               | 5.0-30.0                 | High                        |
| Zinc       | 2.0                 | 1.3-5.0                  | Normal                      |
| Cooper     | 5.0                 | 0.8-3.0                  | High                        |
| Manganese  | 4.70                | 5.0-15.0                 | Low                         |
| Nitrogen   | 12.5                | 10.1-20.0                | Very deficient              |
| pH         | 6.2                 | 6.0-7.5                  | Lightly acid                |

ppm = parts per million.
